# Supplementary material for: Evaluation of a Bayesian hierarchical pharmacokinetic–pharmacodynamic model for predicting parasitological outcomes in Phase 2 studies of new antimalarial drugs
Source: PubMed Central journal article supplement (PMC11373224; doi:10.1128/aac.00863-24), 2024-08-13
Supplement: aac.00863-24-s0001.pdf [file aac.00863-24-s0001.pdf]

**Supplementary Material: Evaluation of a Bayesian hierarchical pharmacokinetic-pharmacodynamic model for predicting parasitological outcomes in Phase 2 studies of new antimalarial drugs**

Meg K Tully<sup>1</sup>, Saber Dini<sup>1</sup>, Jennifer A Flegg<sup>2</sup>, James S McCarthy<sup>3,4,5</sup>, David J Price<sup>1,3,†</sup>, Julie A Simpson<sup>1,6†,\*</sup>

<sup>1</sup>Centre for Epidemiology and Biostatistics, Melbourne School of Population and Global Health, The University of Melbourne, Melbourne, Australia

<sup>2</sup>School of Mathematics and Statistics, The University of Melbourne, Melbourne, Australia

<sup>3</sup>Department of Infectious Diseases, The University of Melbourne, at the Peter Doherty Institute for Infection & Immunity, Melbourne, Australia

<sup>4</sup>Victorian Infectious Diseases Service, Royal Melbourne Hospital, Parkville, Victoria, Australia

<sup>5</sup>Walter and Eliza Hall Institute of Medical Research, Parkville, Victoria, Australia

<sup>6</sup>Nuffield Department of Medicine, University of Oxford, Oxford, UK

Key words: pharmacokinetic-pharmacodynamic modelling, antimalarial, Bayesian methods, simulation

**CONFLICT OF INTEREST**

All authors declared no competing interests for this work.

**FUNDING**

This work was supported by the Australian National Health and Medical Research Council (NHMRC) Leadership Investigator Grants (#1196068 and #2016396) to

JAS and JSM, the Australian Centre for Research Excellence in Malaria Elimination (#2024622) and a NHMRC Synergy Grant (#2018654).

## Contents

|                                                      |           |
|------------------------------------------------------|-----------|
| <b>S1 Pharmacokinetic Diagnostic Checks</b>          | <b>3</b>  |
| <b>S2 Pharmacodynamic Diagnostic Checks</b>          | <b>8</b>  |
| <b>S3 Pharmacokinetic Model</b>                      | <b>13</b> |
| <b>S4 Hierarchical Simulations</b>                   | <b>15</b> |
| <b>S5 Pharmacodynamic Prior Bound Justifications</b> | <b>17</b> |

# 1 S1 Pharmacokinetic Diagnostic Checks

2 Visual comparison of simulations was performed to check for compatibility between  
3 the simulated data sets and Phase 2 trial data of volunteers [1]. An example of  
two simulated data sets are shown in Figure S1. Recall, for each simulated data

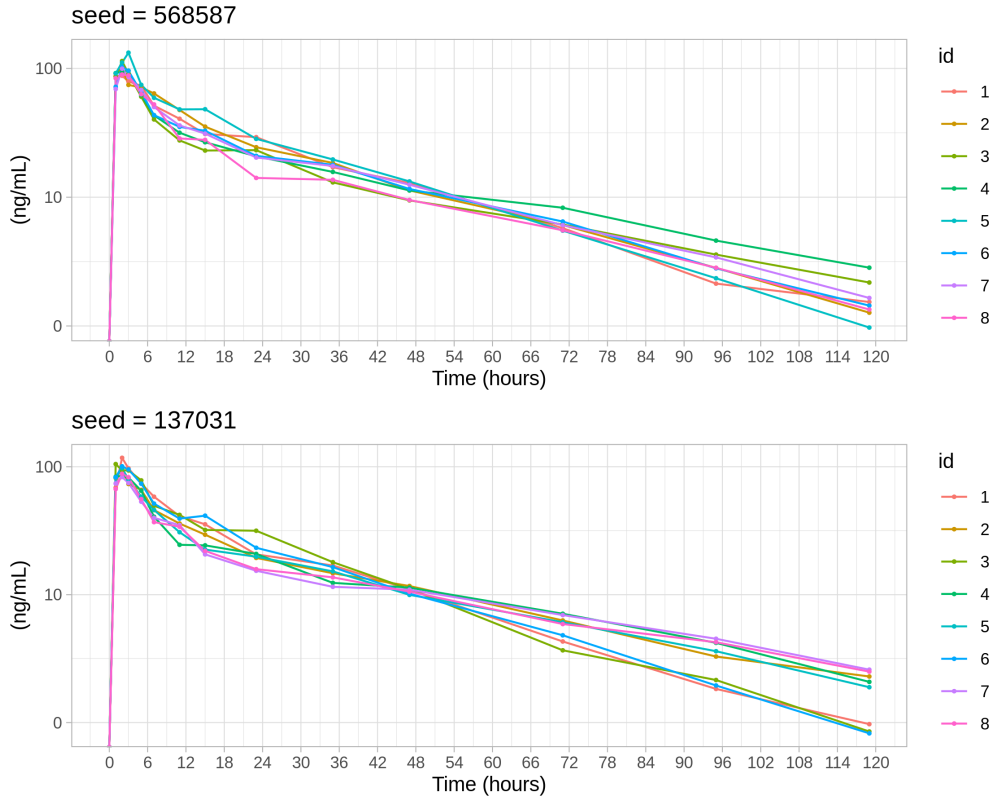

Figure S1: Examples of 2 of the 1000 simulated data sets, each comprising 8 individual patient PK drug profiles for concentration of cipargamin (ng/mL) over time (hours).

4  
5 set consisting of 8 participants, three chains were run with 2000 iterations each, and  
6 500 samples discarded as warm-up. To assess model convergence, trace plots were  
7 produced (Figure S2) and  $\hat{R}$  and  $n_{eff}$  statistics reviewed [2]. For the population and  
8 individual-level parameters in the example data set featured in Figure S2, the mean  
9 effective sample size was 2354 and the minimum was 352. The  $\hat{R}$  values diverged

10 from 1 by less than 0.005. These characteristics are consistent with well-mixed and  
11 converged chains [2].

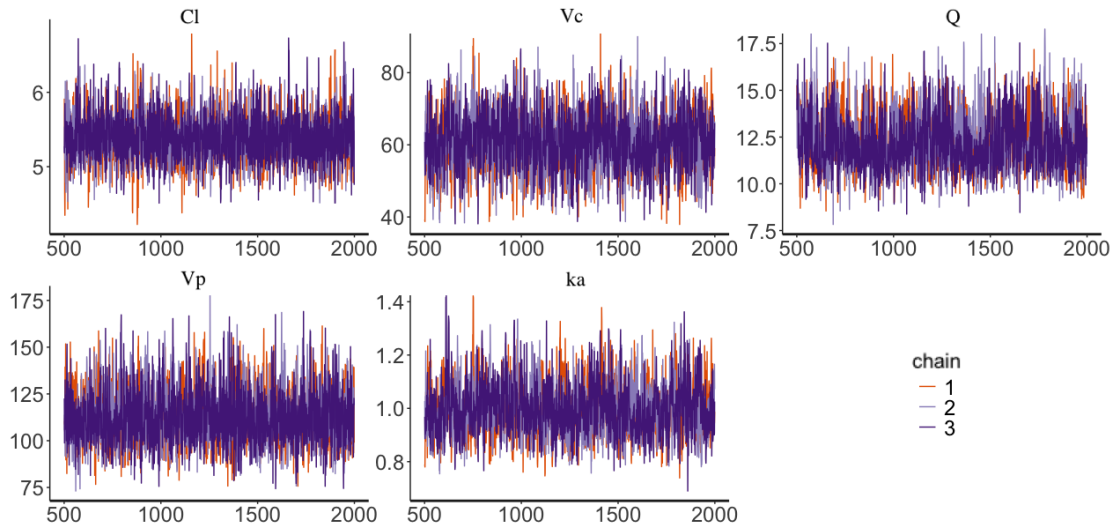

Figure S2: Trace plots from 3 independent chains for 5 population-level PK parameters, from an MCMC sampler run in Stan to an example 8-patient simulated PK data set. The first 500 of the 2000 simulations are discarded from each chain as warm-up.

12

13 When combined, the 3 chains produce 4500 iterations for each parameter, from which  
14 a single median values is calculated as the final estimate. This process is repeated  
15 over the 1000 datasets. The density plots in Figure S3 illustrate the distribution of  
16 the 1000 posterior median estimates for the 5 population parameters, one from each  
17 simulated dataset. The 95% intervals of these distributions are shown as blue shaded  
18 regions.

19

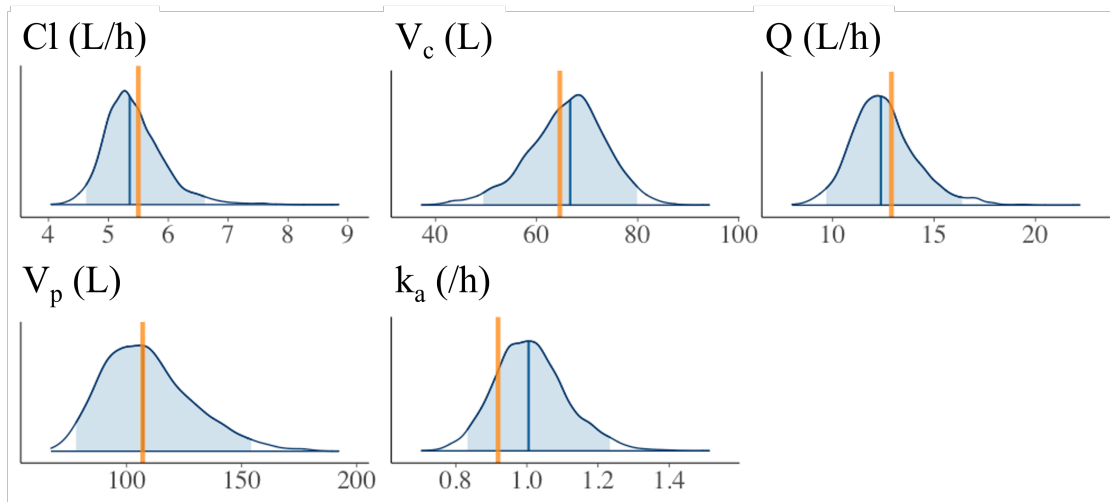

Figure S3: Posterior density plots for 5 population-level PK parameters corresponding to a single example 8-patient simulated PK data set. The shaded blue regions represent the 2.5% to 97.5% quantiles, with the posterior median shown as a vertical blue line. The orange line is the parameter value used to simulate the data.

20 Further evaluation of the model performance was performed via inspection of the 95%  
 21 posterior predictive distributions for each of the 8 patients in a randomly selected  
 22 sample of datasets, one of which is presented in Figure S4. The model fits appear  
 23 sensible, with only points near the peak falling outside the credible intervals for some  
 24 patients.

25 Inspection of the prior-posterior distribution plots for a randomly chosen example  
 26 dataset (Figure S5) demonstrate the chosen prior distributions are suitably broad to  
 27 facilitate appropriate exploration of the plausible range of parameter values. This  
 28 provides evidence that, even in the absence of robust prior parameter estimates, the  
 29 model is capable of locating and producing suitable posterior estimates.

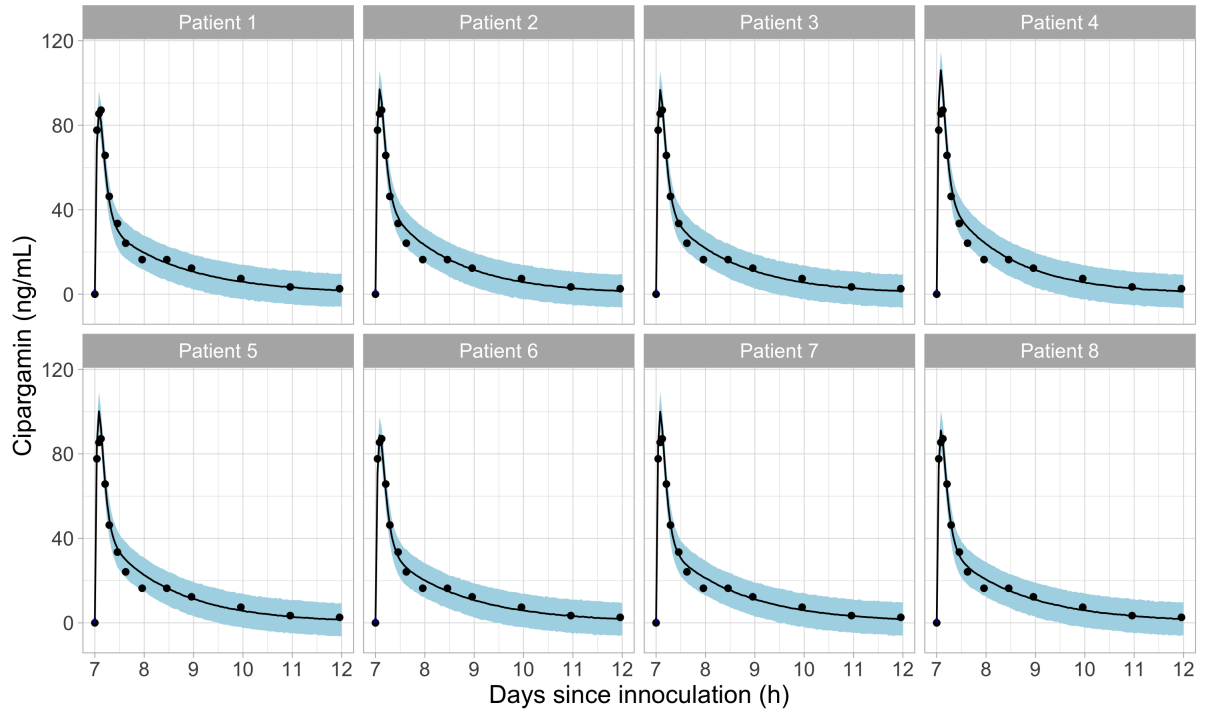

Figure S4: A single simulated dataset of 8 individual patients, with 95% posterior predictive intervals for concentration of cipargamin (ng/mL) over time (h) shaded in blue. The black line is the median posterior profile and the simulated data points are the black circles.

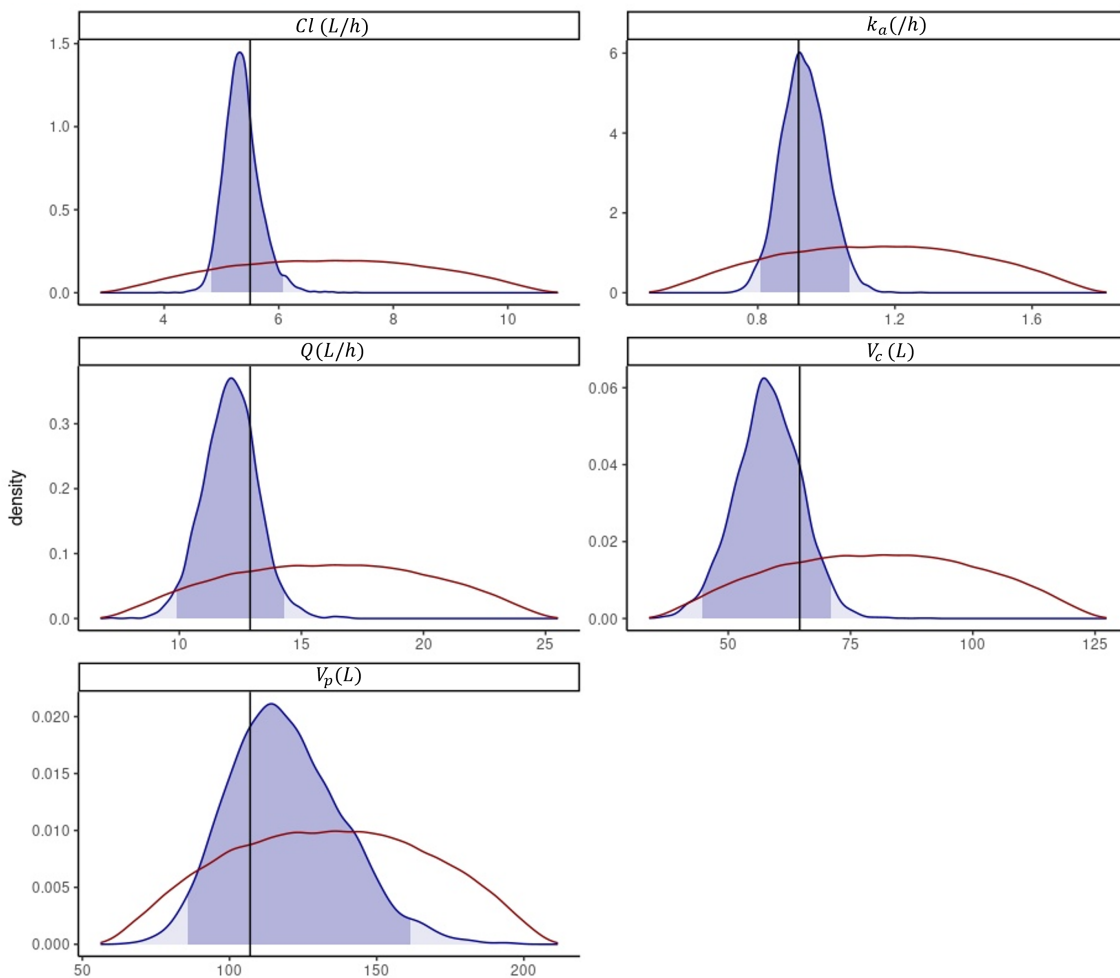

Figure S5: Prior density distributions for PK parameters (red line) alongside posterior densities from the MCMC sampler of a single randomly selected dataset (blue line) and associated 95% credible intervals (blue shading). The black vertical line indicates the 'true' underlying parameter value.

## 30 S2 Pharmacodynamic Diagnostic Checks

31 As for the pharmacokinetic model, we visually inspected the simulated parasitaemia  
32 time profiles to confirm a good match between the simulated (Figure S6) and real  
33 Phase 2 trial data of volunteers shown in Figure 2 (pg 5) of [1]. We note a small  
34 difference in the post-treatment minimum parasite count, which occurs 8.5 days after  
35 inoculation in the study data, and at day 8 in the simulated data. We also inspected  
36 the prior-posterior distribution plots for a random selection of datasets, one shown in  
37 Figure S9, confirming the suitability of our prior ranges.

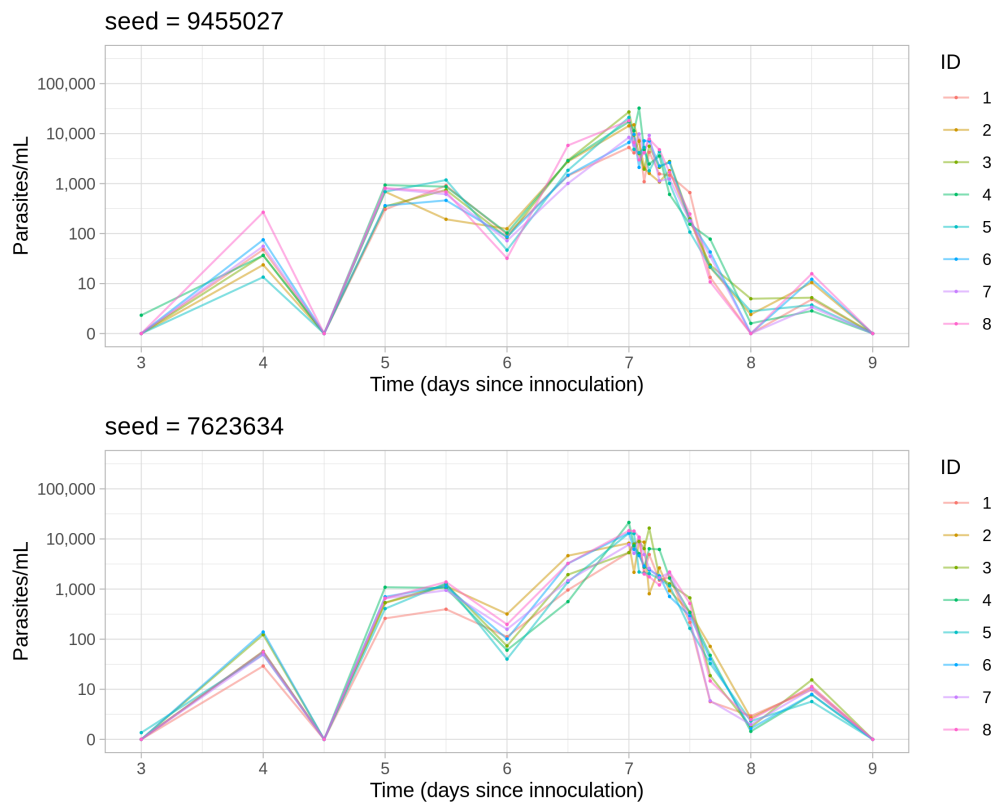

Figure S6: Two example simulated data sets, each comprising 8 individual patient PD profiles for concentration of parasites (ng/mL) over time (hours).

38 The 8 patient posterior predictive intervals were plotted for a random sample of



39 3 data sets (Figure S7) which demonstrated that the model was able to consistently  
40 capture the data well.

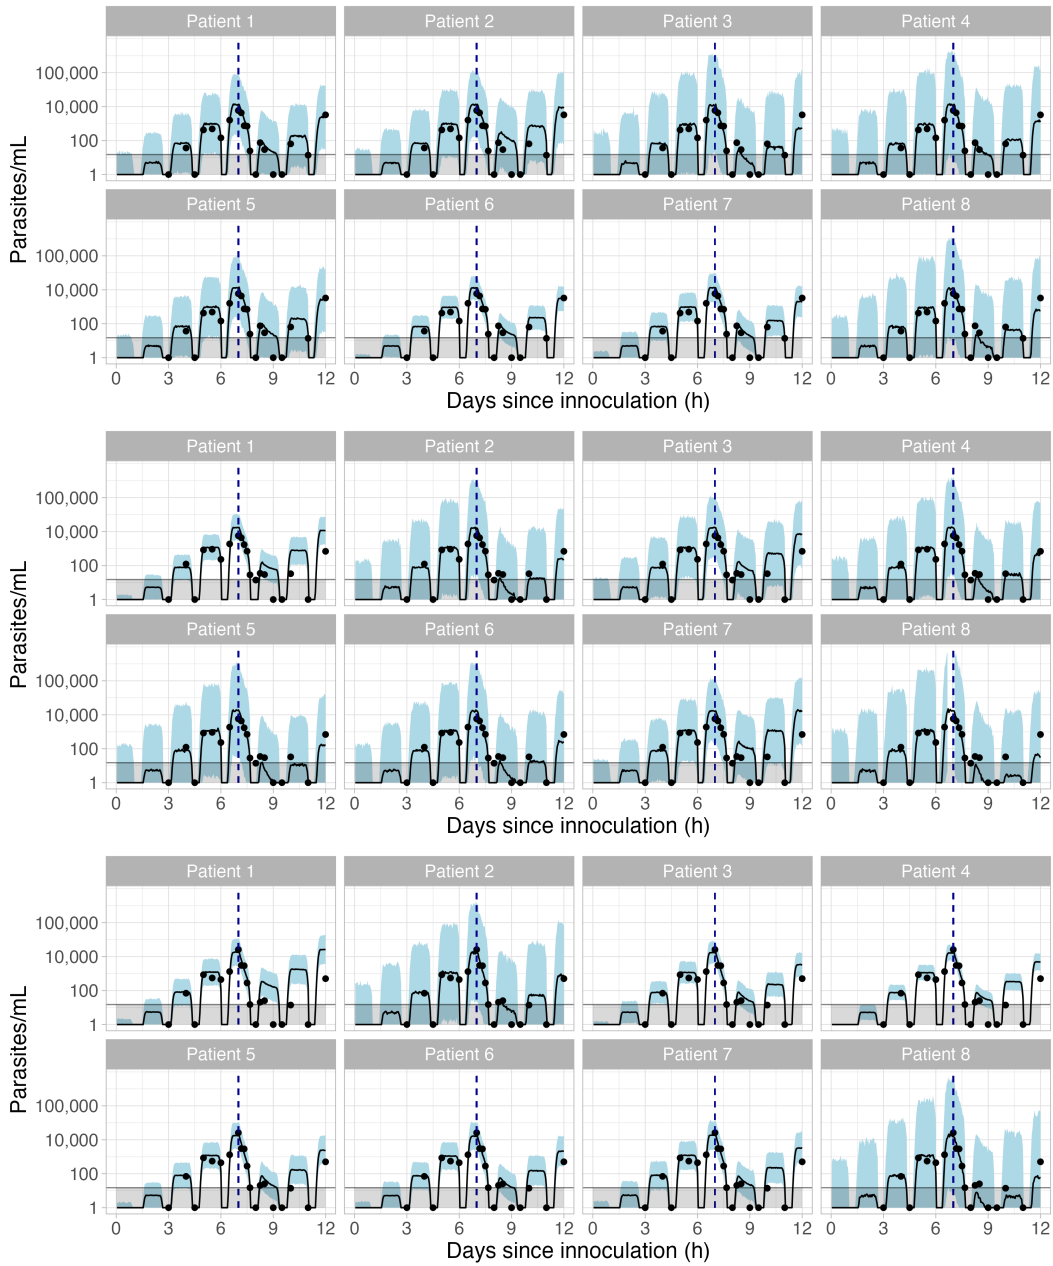

Figure S7: 95% posterior predictive distributions (blue shading) of parasite time profiles (days since inoculation) for each of 3 randomly selected simulations consisting of 8 individual patients. The black line is the median posterior profile and the simulated data points (with noise removed) are the black circles. The grey shaded area represents the region of the y-axis below the LLOQ (50 parasites/mL) and the vertical dashed line is the time the drug is administered (7 days post-inoculation).

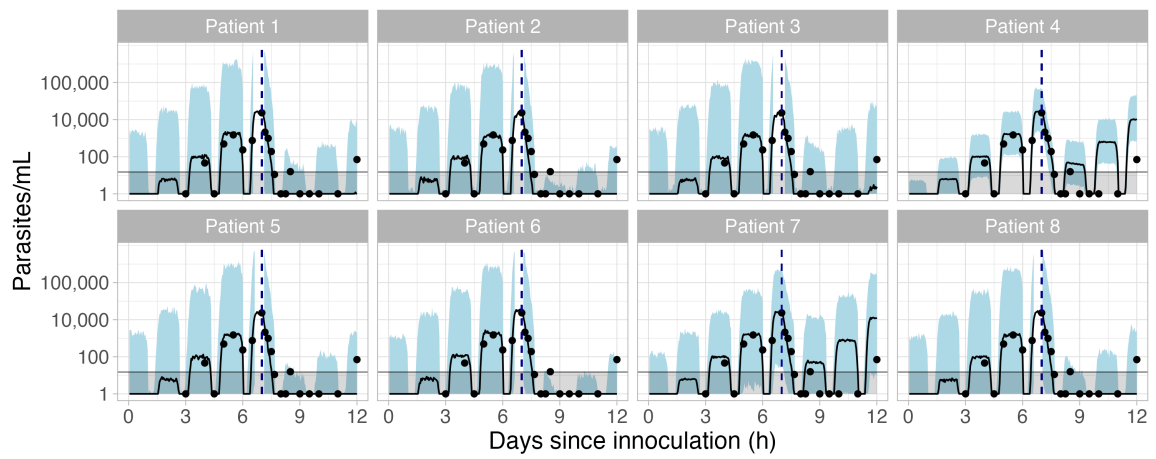

Figure S8: An example of a dataset where the post-treatment parasitaemia is underestimated.

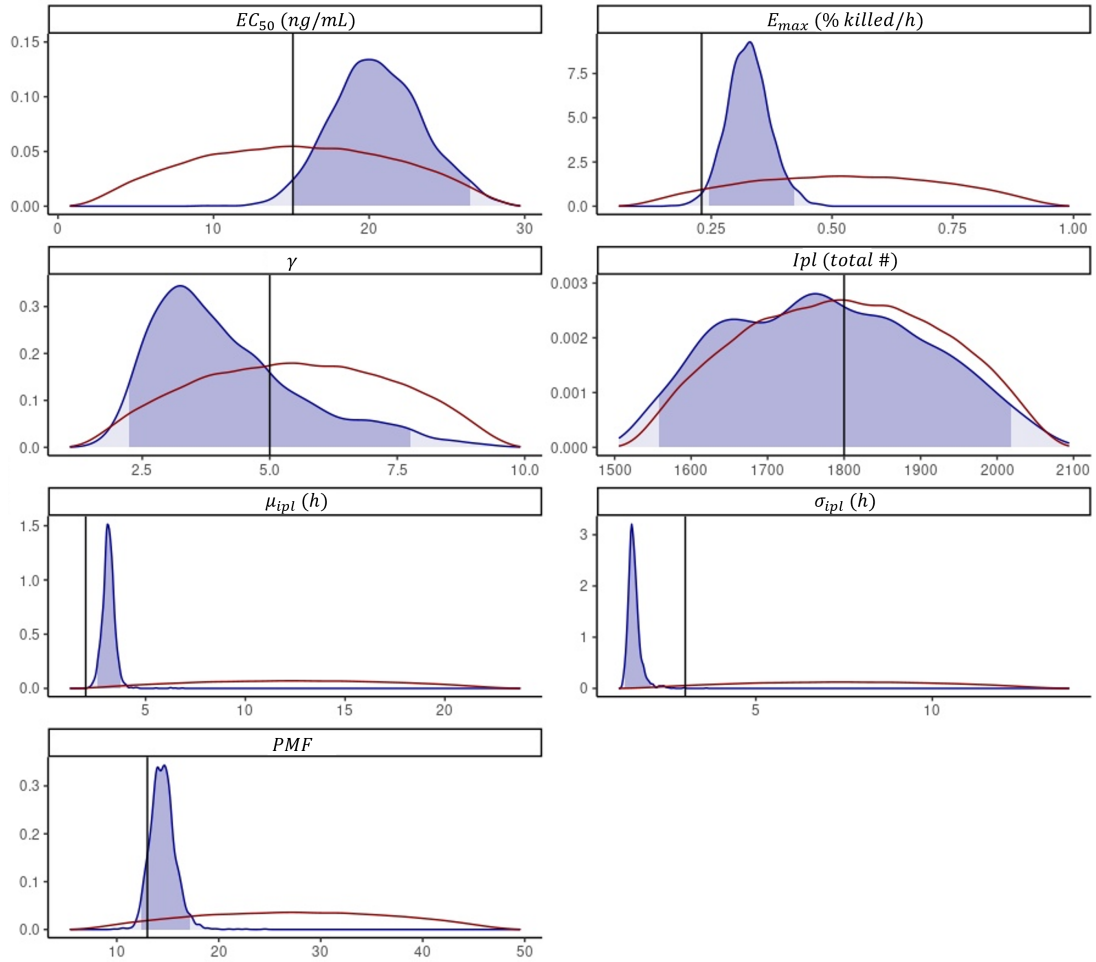

Figure S9: Prior density distributions for PD parameters (red line) alongside posterior densities from the MCMC sampler of a single randomly selected dataset (blue line) and associated 95% credible intervals (blue shading). The black vertical line indicates the 'true' underlying parameter value

### 41 S3 Pharmacokinetic Model

42 The 2-compartment 1<sup>st</sup> order absorption PK model with linear elimination has the  
43 following structure:

$$C(t) = D(Ae^{-\alpha t^*} + Be^{-\beta t^*} + Ce^{-t^*} - (A + B + C)e^{-k_a t^*}),$$

44 where

- 45 •  $C(t)$  = Concentration at time  $t$  (mg/L)
- 46 •  $D$  = Dose (mg)
- 47 •  $t$  = Time (h)
- 48 •  $t_{lag}$  = Absorption lag time (h)
- 49 •  $t_{dose}$  = Time of dose (h)
- 50 •  $Cl$  = Elimination clearance (L/h)
- 51 •  $V_c$  = Central compartment volume (L)
- 52 •  $Q$  = Inter-compartmental clearance rate (L/h)
- 53 •  $V_p$  = Peripheral compartment volume (L)
- 54 •  $k_a$  = Absorption rate constant ( $\text{h}^{-1}$ )

55 and

- 56 •  $\alpha = \left(\frac{Cl}{V_c} \frac{Q}{V_p}\right) / \beta$
- 57 •  $\beta = \frac{1}{2} \left(\frac{Cl}{V_c} + \frac{Q}{V_c} + \frac{Q}{V_p} - \sqrt{\left(\frac{Cl}{V_c} + \frac{Q}{V_c} + \frac{Q}{V_p}\right)^2 - 4\frac{Cl}{V_c} \frac{Q}{V_p}}\right)$
- 58 •  $A = \frac{k_a}{V_c} \frac{Q/V_p - \alpha}{(k_a - \alpha)(\beta - \alpha)}$
- 59 •  $B = \frac{k_a}{V_c} \frac{Q/V_p - \beta}{(k_a - \beta)(\alpha - \beta)}$

60 •  $C = \frac{-(A(k_a - \alpha) + B(k_a - \beta))}{k_a}$

61 •  $t^* = t - t_{lag} - t_{dose}$

62 The trial data from McCarthy *et al.* [1] shows a drop in parasitaemia immediately  
63 after drug administration. Therefore, we assumed cipargamin had a direct impact  
64 on the parasites, and no effect-delay parameters (i.e.,  $k_{e0}$ ,  $t_{lag}$ ) were included in the  
65 model.

## 66 S4 Hierarchical Simulations

67 Each of the 8 patient’s individual PK parameters,  $\boldsymbol{\theta}_i$ , ( $Cl, V_c, Q, V_p, K_a$ ), were drawn  
 68 from distributions centred at the population-level parameter estimates ( $\boldsymbol{\theta}$ , Table 3) via  
 69 the following procedure. We represented individual PK parameters,  $\boldsymbol{\theta}_i$ ,  $i = 1, \dots, 8$ ,  
 70 using a logistic transformation with bounds to ensure biologically plausible values,

71

$$\begin{aligned} \phi_i &= \log \left( \frac{\boldsymbol{\theta}_i - \mathbf{a}}{\mathbf{b} - \boldsymbol{\theta}_i} \right) && \text{(Fraction is **element-wise**)} \\ &= \log \left( \frac{\boldsymbol{\theta} - \mathbf{a}}{\mathbf{b} - \boldsymbol{\theta}} \right) + \boldsymbol{\eta}_i \\ &= \boldsymbol{\phi} + \boldsymbol{\eta}_i, \end{aligned}$$

where  $\boldsymbol{\phi}_i$  are logistic-transformed population average PK parameters, vectors  $\mathbf{a}$  and  $\mathbf{b}$  are vectors containing the upper and lower bounds (respectively) for each parameter, and  $\boldsymbol{\eta}_i$  are multivariate normal-distributed *variations* of each individuals parameter values from the logistic-transformed population averages  $\boldsymbol{\phi}$ . The individual deviations from these averages followed a multivariate normal distribution with mean  $\mathbf{0}$  and covariance matrix  $\boldsymbol{\Sigma}$ . That is,

$$\boldsymbol{\eta}_i \sim MVN(\mathbf{0}, \boldsymbol{\Sigma}).$$

The variance matrix  $\boldsymbol{\Sigma}$  was set to the between-individual standard deviation for each PK parameter,  $\boldsymbol{\omega}$ , estimated in the target trial [1], and correlation between the PK parameters was sampled from a standard uniform distribution separately for each of the 1000 simulated datasets, such that:

$$\boldsymbol{\Sigma} = \text{diag}(\boldsymbol{\omega})\mathbf{R}\text{diag}(\boldsymbol{\omega}), \quad \mathbf{R} = \mathbf{L}\mathbf{L}^T,$$

72 where  $\mathbf{L}$  is a lower-diagonal matrix with entries  $a_i$  distributed uniformly between 0  
73 and 1:

$$\text{diag}(\boldsymbol{\omega}) = \begin{bmatrix} 0.325 & 0 & 0 & 0 & 0 \\ 0 & 0.227 & 0 & 0 & 0 \\ 0 & 0 & 0.1 & 0 & 0 \\ 0 & 0 & 0 & 1 & 0 \\ 0 & 0 & 0 & 0 & 0.1 \end{bmatrix} \quad \mathbf{L} = \begin{bmatrix} a_1 & 0 & 0 & 0 & 0 \\ a_2 & a_3 & 0 & 0 & 0 \\ a_4 & a_5 & a_6 & 0 & 0 \\ a_7 & a_8 & a_9 & a_{10} & 0 \\ a_{11} & a_{12} & a_{13} & a_{14} & a_{15} \end{bmatrix}, a_i \sim U(0, 1).$$

74 Finally as described in the main text, multiplicative error terms for individual observations  
75 were drawn from a normal distribution with a mean of 0 with variance  $\sigma^2$ , and  
76 exponentiated. The  $\sigma^2$  value was generated individually for each dataset, drawn from  
77 a log-normal distribution centred at 0.1.

78 The PD model follows an essentially identical structure for the 7 key parameters,  
79  $\boldsymbol{\theta}_i$ ; ( $i_{pl}$ ,  $\mu_{ipl}$ ,  $\sigma_{ipl}$ ,  $PMF$ ,  $E_{max}$ ,  $EC_{50}$ ,  $\gamma$ ), Table 5. The input values for the diagonal  
80 matrix  $\boldsymbol{\omega} = \begin{bmatrix} 0.2 & 0.2 & 0.2 & 0.0242 & 0.2 & 0.2 & 0.2 \end{bmatrix}$  were based upon the between-  
81 subject variances estimated from the analysis of the trial data in McCarthy *et al.*  
82 (2021) [1], but again these values are chosen to be a base for the random variance-  
83 covariance matrix.



## 84 **S5 Pharmacodynamic Prior Bound Justifications**

85 The PD parameter prior bounds ( $\mathbf{a}$  and  $\mathbf{b}$  in Table 5) were selected to be suitably  
86 broad and unrestrictive, whilst still biologically plausible.

87 The initial parasite load (which is known to have a high degree of accuracy in volunteer  
88 infection studies, as observed in McCarthy et al. [1]) was given bounds of 300 parasites  
89 either side of the inoculation value of 1800 in McCarthy et al. [1].

90 The initial parasite distribution mean age  $\mu_{ipl}$  was limited to ages at which the  
91 parasites are still circulating (1 to 24 hours old), as the parasites could not have  
92 sequestered already at time of inoculation.

93 Similarly, the spread of parasite ages,  $\sigma_{ipl}$ , was allowed to vary between 1 and 14,  
94 where 1 represents a highly synchronous infection, and 14 would represent a highly  
95 asynchronous infection, and 14 would represent a highly asynchronous infection with  
96 parasites distributed across the entire lifespan (1-40h). The PMF value has been  
97 estimated in studies to have values as low as 8 [3] and as high as 32 [4], therefore  
98 5–50 were sufficiently broad limits that include all potentially feasible values.

99 The maximum killing effect,  $E_{max}$ , is a percentage value, so we allowed drug  
100 effect to range from 5-100%, assuming a true effect of <5% kill rate would prevent  
101 a potential drug from reaching clinical trials (and encompasses our chosen value for  
102 simulation of 23%).

103 The concentration of 50% maximum kill rate,  $EC_{50}$ , was allowed to range from  
104 very low (0.5 ng/mL) to moderately high (30ng/mL) at approximately 30% of the  
105 maximum drug concentration achieved in the clinical study. Lastly, studies have  
106 found the  $\gamma$  parameter, which controls the sharpness of the concentration-effect curve,  
107 often has a value around 2-3 [5]. Artemisinin-derived compounds, which have an  
108 extremely sharp cutoff, have a high value around 4-6 [5]. Therefore, our chosen limits

109 of 1-10 were conservatively selected to cover these plausible values.

## 110 **References**

- 111 [1] McCarthy JS, Abd-Rahman AN, Collins KA, Marquart L, Griffin P, Kümmel  
112 A, Fuchs A, Winnips C, Mishra V, Csermak-Renner K, Jain JP Gandhi P.  
113 2021, Defining the Antimalarial Activity of Cipargamin in Healthy Volunteers  
114 Experimentally Infected with Blood-Stage Plasmodium falciparum. Antimicrobial  
115 agents and chemotherapy, 65(2): e01423–20. [https://doi.org/10.1128/AAC.](https://doi.org/10.1128/AAC.01423-20)  
116 01423–20.
- 117 [2] Gelman A, Carlin JB, Stern HS, Dunson D B, Vehtari A Rubin DB. 2020,  
118 Bayesian Data Analysis (Third edition). 3rd. New York, 2020, 675. [https://](https://doi.org/10.1201/b16018)  
119 [doi.org/10.1201/b16018](https://doi.org/10.1201/b16018).
- 120 [3] Simpson JA, Aarons L, Collins W, Jeffery G White N. 2002, Population dynamics  
121 of untreated Plasmodium falciparum malaria within the adult human host during  
122 the expansion phase of the infection. Parasitology, 124(3): 247–263. [https://](https://doi.org/10.1017/S0031182001001202)  
123 [doi.org/10.1017/S0031182001001202](https://doi.org/10.1017/S0031182001001202).
- 124 [4] Wockner LF, Hoffmann I, Webb L, Mordmuller B, Murphy SC, Kublin JG,  
125 O'Rourke P, McCarthy JS Marquart L. 2020, Growth Rate of Plasmodium  
126 falciparum: Analysis of Parasite Growth Data From Malaria Volunteer Infection  
127 Studies. J Infect Dis, 221(6): 963–972. [https://doi.org/10.1093/infdis/](https://doi.org/10.1093/infdis/jiz557)  
128 [jiz557](https://doi.org/10.1093/infdis/jiz557).
- 129 [5] Simpson JA, Jansen KM, Anderson TJC, Zaloumis S, Nair S, Woodrow C,  
130 White NJ, Nosten F Price RN. 2013, Nonlinear Mixed-Effects Modelling of  
131 In Vitro Drug Susceptibility and Molecular Correlates of Multidrug Resistant

132 Plasmodium falciparum. PLOS ONE, 8(7): 1–9. <https://doi.org/10.1371/>  
133 [journal.pone.0069505](https://doi.org/10.1371/journal.pone.0069505).
